# Supplementary material for: Interferon-related secretome from direct interaction between immune cells and tumor cells is required for upregulation of PD-L1 in tumor cells
Source: PubMed Central journal article supplement (PMC4930771; doi:10.1007/s13238-016-0281-6), 2016-06-13
Supplement: 13238_2016_281_MOESM1_ESM.pdf [file 13238_2016_281_MOESM1_ESM.pdf]

## Supplementary Figures

Fig. S1

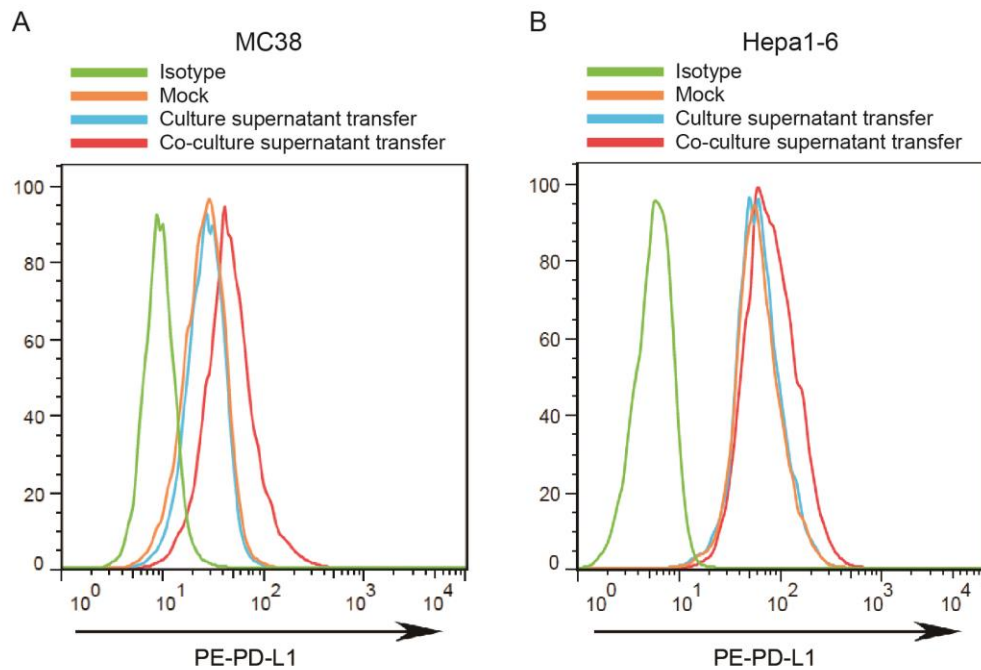

### Fig.S1

Supernatant-mediated induction of PD-L1 on other tumor cell lines. MC38 cells or Hepa1-6 cells were cultured with splenocytes and the supernatants from these co-cultures were added to mono-cultures of these tumor cells as in Fig 3A. PD-L1 expression on MC38 cells (A) and Hepa1-6 cells (B) was analyzed by flow cytometry.

Fig. S2

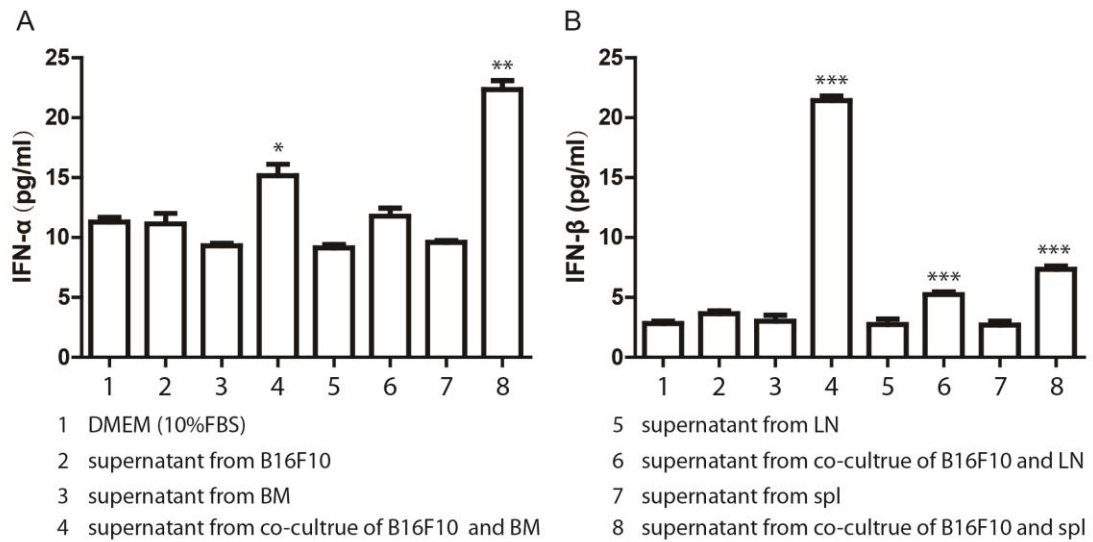

**Fig.S2**

B16F10, BM, LN and splenocytes culture along, and B16F10 co-culture with BM, LN and splenocytes. Then the supernatant were collected after 48 hr. IFN- $\alpha$  (Fig. S2A) and IFN- $\beta$  (Fig. S2B) was quantified by ELISA in different supernatants.

Fig. S3

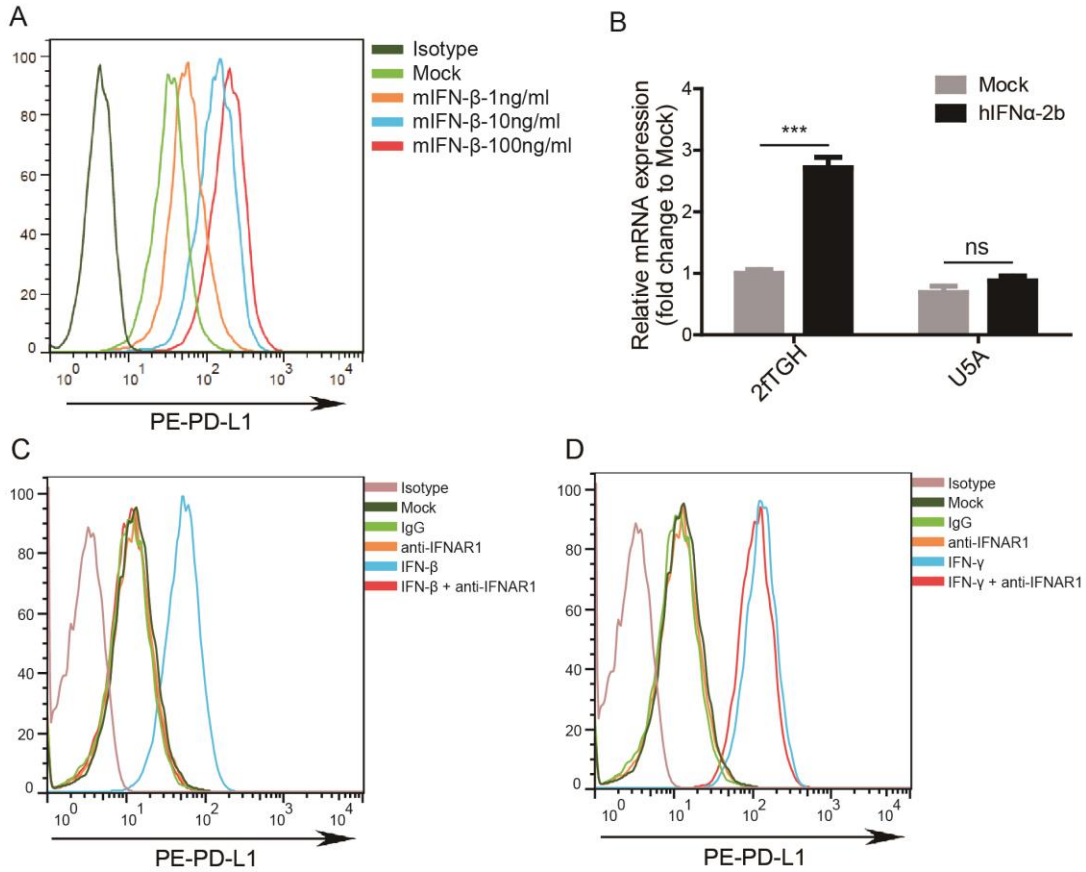

**Fig.S3**

Type I interferon induced the expression of PD-L1 in multiple tumor cell lines. (A) PD-L1 was induced in a titratable fashion by different concentrations (1 ng/ml, 10 ng/ml, 100 ng/ml) of mouse IFN-β, as assessed by flow cytometry. (B) Human fibrosarcoma 2fTGH cells (*ifnar2*<sup>+/+</sup>) and U5A(*ifnar2*<sup>-/-</sup>) cells were stimulated by human IFN-α at 10ng/ml. PD-L1 expression was observed by RT-qPCR . (C and D) Both type I and II interferon induced PD-L1 expression in B16F10 cells. B16F10 cells were treated by mouse IFN-β, mouse IFN-β+IFNAR1, then PD-L1 was detected by flow cytometry. Similarly, PD-L1 expression was observed after cells treated with mouse IFN-γ, mouse IFN-γ+IFNAR1.

Fig. S4

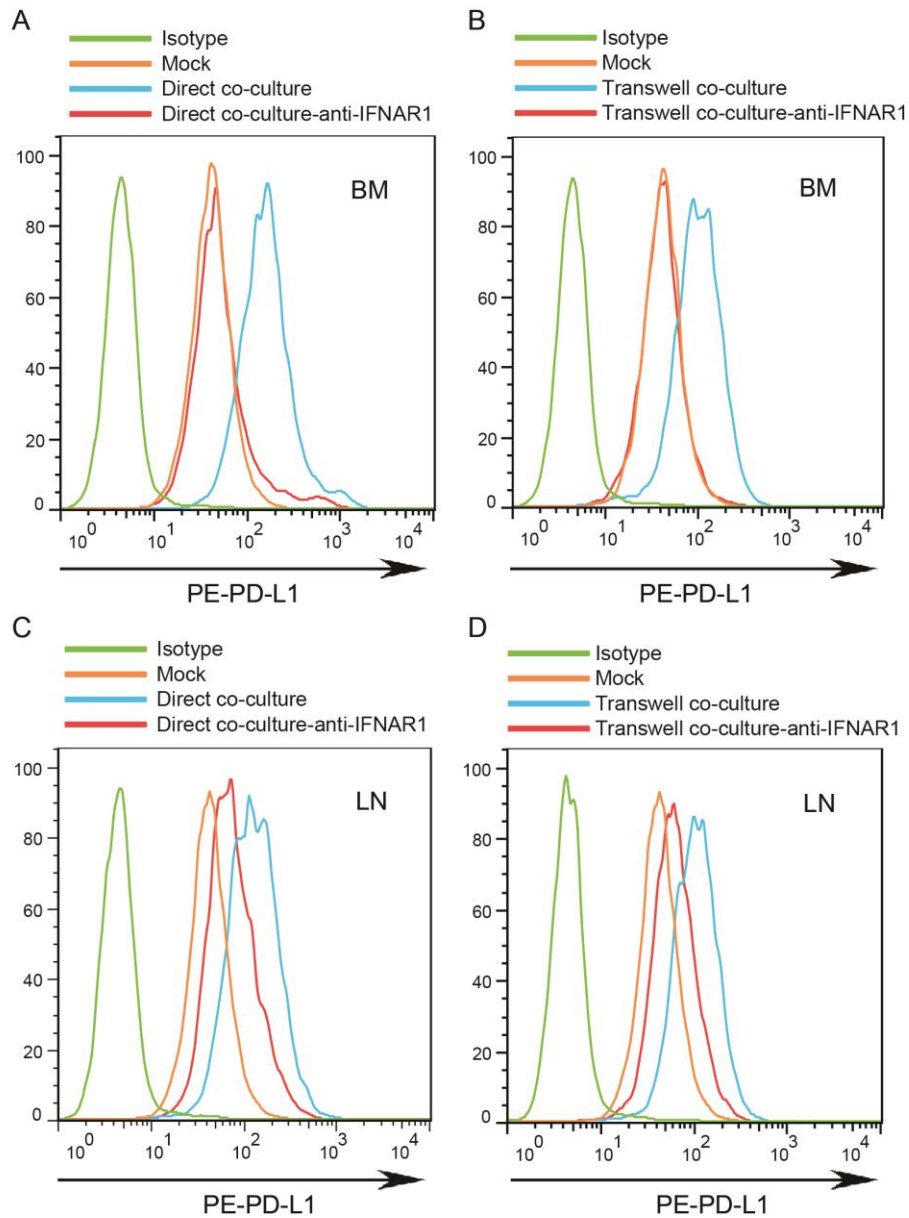

**Fig.S4**

Upregulation of PD-L1 in tumor cells was dependent on IFNAR1 signaling in BM and LN cell co-culture system. Similarly to Fig. 2E and 2F, but using other sources of immune cells, B16F10 cells were co-cultured with primary BM or LN cells in different co-culture systems with or without the addition of 20ug/mL anti-IFNAR1 antibody. PD-L1 expression was measured by flow cytometry in the direct co-culture system (A and C) or the transwell co-culture system (B and D).

Fig. S5

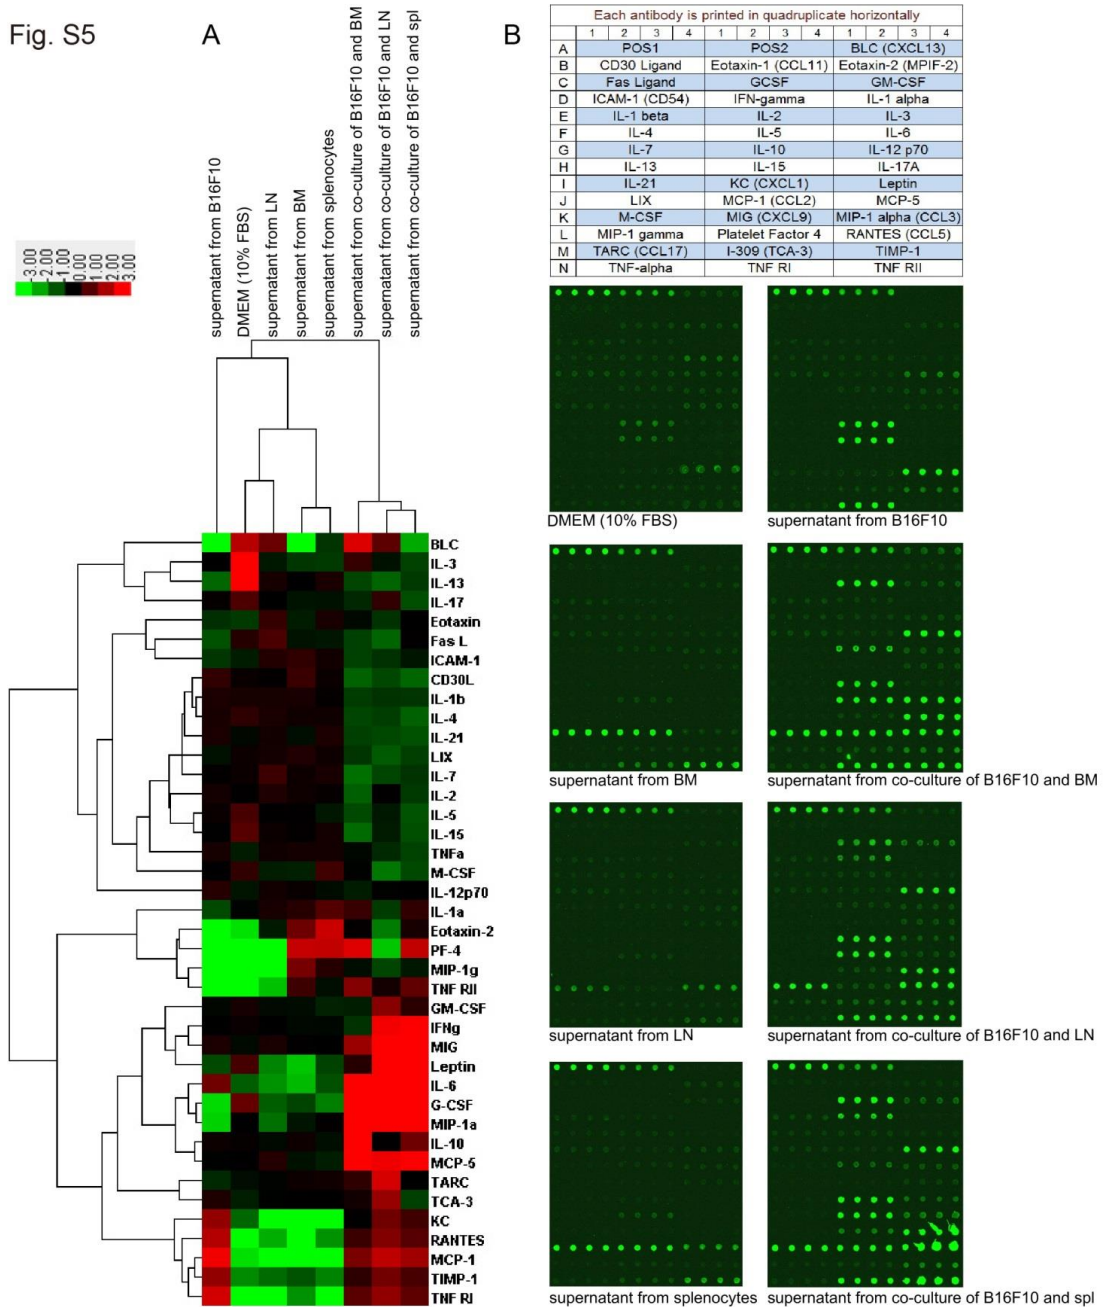

**Fig.S5**

Detection the secreted factors in different supernatants. (A) Heatmap data for the different sectors from collected supernatants (B16F10, BM, LN and splenocytes single culture as well as B16F10 co-culture with BM, LN and splenocytes for 48 hours). (B) Detailed information on Cytokines/chemokines microarray. The arrangement for the targeting cytoke/chemokines in the chip( upper table) and the scanned fluoresced signaling for the chip (bottom ).
